# Supplementary material for: Amendments to saline-sodic soils showed long-term effects on improving growth and yield of rice (Oryza sativa L.)
Source: PeerJ. 2020 Mar 10;8:e8726. doi: 10.7717/peerj.8726 (PMC7069413; doi:10.7717/peerj.8726)
Supplement: Supplemental Information 1 [file peerj-08-8726-s001.xlsx]

## Sheet: Sheet1
Contents of potassium and sodium ion of different rice organs
amendments：1，CK;2，mixture；3，gypsum；4，sandy soil；5，maure；organs 1，sheath；2，leaf；3，root；4，grain
				content					content
Treatment	organs	Dry weight（g）	volume（ml）	Na+（ug/ml）	K+（ug/ml）				Na+（mg/g DW）	K+（mg/g DW）	Na+/K+
5	1	0.299	100	3.08655	4.95693				1.03229	1.65784	0.622673
5	1	0.313	100	3.21785	7.49693				1.02807	2.39519	0.429222
5	1	0.238	100	3.61495	5.40593				1.51889	2.2714	0.6687
3	1	0.264	100	3.82305	11.2828				1.44813	4.2738	0.338838
3	1	0.339	100	3.19095	12.7446				0.941283	3.75948	0.250376
3	1	0.276	104	3.27615	6.12973				1.23449	2.30975	0.534469
4	1	0.294	100	3.19395	3.87893				1.08638	1.31936	0.823409
4	1	0.282	100	3.65445	10.9256				1.2959	3.87434	0.334484
4	1	0.288	100	3.67555	14.6635				1.27623	5.0915	0.250659
1	1	0.277	100	3.09295	4.65003				1.11659	1.67871	0.665146
1	1	0.305	100	3.09785	3.39963				1.01569	1.11463	0.911231
1	1	0.305	100	3.11215	5.71873				1.02038	1.87499	0.544203
2	1	0.291	100	3.57235	4.05323				1.22761	1.39286	0.881358
2	1	0.29	100	4.22345	14.9736				1.45636	5.16332	0.282059
2	1	0.295	100	4.00285	13.7564				1.3569	4.6632	0.29098
3	1	0.285	100	4.06965	15.5656				1.42795	5.46163	0.261451
3	1	0.282	100	3.72925	14.7318				1.32243	5.22405	0.253142
3	1	0.264	100	3.68695	12.2984				1.39657	4.6585	0.29979
1	1	0.295	100	3.13235	7.76963				1.06181	2.63377	0.403153
1	1	0.297	100	3.20785	4.58773				1.08008	1.54469	0.699223
1	1	0.302	100	3.10245	3.68703				1.0273	1.22087	0.841449
4	1	0.276	100	3.55155	13.1772				1.28679	4.77436	0.269522
4	1	0.308	100	3.42915	12.4215				1.11336	4.03297	0.276065
4	1	0.301	100	3.20595	9.17023				1.0651	3.04659	0.349604
2	1	0.293	100	3.78055	15.6042				1.29029	5.32568	0.242277
2	1	0.294	100	3.56955	13.6713				1.21413	4.65011	0.261097
2	1	0.305	100	4.06425	15.8871				1.33254	5.2089	0.25582
5	1	0.298	100	3.30165	10.8311				1.10794	3.63461	0.30483
5	1	0.298	100	3.29825	9.53593				1.1068	3.19998	0.345876
5	1	0.303	100	3.16335	9.32773				1.04401	3.07846	0.339134
1	1	0.307	100	3.12885	12.8043				1.01917	4.17079	0.244359
1	1	0.296	108	3.10835	4.65543				1.13413	1.6986	0.667682
1	1	0.303	100	3.11345	6.02233				1.02754	1.98757	0.516984
5	1	0.289	100	3.16645	6.77343				1.09566	2.34375	0.467481
5	1	0.278	100	3.24865	8.79673				1.16858	3.16429	0.369302
5	1	0.3	100	3.15855	6.95153				1.05285	2.31718	0.454367
4	1	0.271	100	3.25445	5.49853				1.2009	2.02898	0.591876
4	1	0.307	100	3.17945	5.41213				1.03565	1.76291	0.587467
4	1	0.24	100	3.18195	14.7049				1.32581	6.12706	0.216387
3	1	0.229	100	3.72765	14.3085				1.62779	6.24827	0.260519
3	1	0.3	100	3.3193	12.8656				1.10643	4.28854	0.257997
3	1	0.28	100	3.3082	9.84343				1.1815	3.51551	0.336082
2	1	0.297	100	3.985	15.1741				1.34175	5.10914	0.262618
2	1	0.287	100	3.946	15.1314				1.37491	5.27228	0.260782
2	1	0.306	100	3.6329	15.4618				1.18722	5.05289	0.234959
5	2	0.232	100	3.9416	13.5437				1.69897	5.8378	0.291028
5	2	0.271	100	4.4337	15.332				1.63605	5.65756	0.289179
5	2	0.252	100	4.8271	15.7502				1.91552	6.25008	0.306479
3	2	0.269	100	5.1012	14.8404				1.89636	5.51688	0.343737
3	2	0.255	100	5.0349	15.1084				1.97447	5.92486	0.333252
3	2	0.322	100	4.6396	14.5897				1.44087	4.53096	0.318005
4	2	0.263	100	4.4599	13.528				1.69578	5.14373	0.329679
4	2	0.283	100	4.839	14.8234				1.70989	5.23795	0.326443
4	2	0.296	100	4.8824	14.6656				1.64946	4.95459	0.332915
1	2	0.318	100	3.3837	4.5403				1.06406	1.42777	0.745259
1	2	0.287	100	3.5657	4.0453				1.2424	1.40951	0.881443
1	2	0.298	100	4.0513	6.7648				1.3595	2.27007	0.598879
2	2	0.294	100	3.0191	13.9074				1.0269	4.73041	0.217086
2	2	0.272	100	2.3143	14.2511				0.850846	5.23937	0.162394
2	2	0.29	100	3.2027	13.5643				1.10438	4.67734	0.236112
3	2	0.294	100	3.0359	14.1589				1.03262	4.81595	0.214416
3	2	0.272	100	4.3938	14.4872				1.61537	5.32618	0.303288
3	2	0.27	100	4.6957	13.8021				1.73915	5.11189	0.340216
1	2	0.29	100	4.5859	15.3051				1.58134	5.27762	0.299632
1	2	0.305	100	4.6238	13.85				1.516	4.54098	0.333848
1	2	0.272	100	4.2832	12.658				1.57471	4.65368	0.338379
4	2	0.315	100	4.9375	13.5128				1.56746	4.28978	0.365394
4	2	0.312	100	4.9607	13.8187				1.58997	4.42907	0.358985
4	2	0.284	100	4.6923	14.5551				1.65222	5.12504	0.322382
2	2	0.309	100	3.6133	13.3018				1.16935	4.30479	0.27164
2	2	0.256	100	4.7982	13.921				1.8743	5.43789	0.344674
2	2	0.317	100	4.3667	13.2932				1.37751	4.19344	0.328491
5	2	0.295	100	4.7333	14.1327				1.60451	4.79075	0.334918
5	2	0.293	100	4.8277	14.0716				1.64768	4.80259	0.343081
5	2	0.299	100	4.4136	14.1946				1.47612	4.74736	0.310935
1	2	0.298	100	4.6831	13.2515				1.57151	4.44681	0.353402
1	2	0.323	100	3.7095	12.6926				1.14845	3.9296	0.292257
1	2	0.29	100	3.8667	13.2282				1.33334	4.56145	0.292307
5	2	0.3	100	4.4082	14.7837				1.4694	4.9279	0.29818
5	2	0.288	100	4.4764	14.8714				1.55431	5.16368	0.301007
5	2	0.315	100	4.6072	14.3057				1.4626	4.54149	0.322053
4	2	0.289	100	4.3791	15.4262				1.51526	5.33779	0.283874
4	2	0.293	100	4.2843	15.6732				1.46222	5.34922	0.273352
4	2	0.31	100	4.4618	13.913				1.43929	4.48806	0.320693
3	2	0.297	100	4.5825	14.1504				1.54293	4.76444	0.323842
3	2	0.305	100	5.0347	13.867				1.65072	4.54656	0.363071
3	2	0.282	100	5.0003	14.1456				1.77316	5.01617	0.353488
2	2	0.304	100	3.318	13.074				1.09145	4.30066	0.253786
2	2	0.289	100	3.8418	13.4066				1.32934	4.63896	0.28656
2	2	0.322	100	5.0431	13.1099				1.56618	4.0714	0.384679
5	3	0.16	100	4.1286	4.8065				2.58037	3.00406	0.858962
5	3	0.172	100	3.5128	3.6325				2.04233	2.11192	0.967047
5	3	0.177	100	4.7791	4.5171				2.70006	2.55203	1.058
3	3	0.184	100	3.7224	4.2962				2.02304	2.33489	0.86644
3	3	0.212	100	3.4491	5.6913				1.62693	2.68458	0.60603
3	3	0.206	100	3.9752	5.2925				1.92971	2.56917	0.751101
4	3	0.162	100	3.1595	3.4296				1.95031	2.11704	0.921244
4	3	0.184	100	2.1917	5.2696				1.19114	2.86391	0.415914
4	3	0.205	100	3.3892	6.0931				1.65327	2.97224	0.556236
1	3	0.218	100	3.9756	5.2803				1.82367	2.42216	0.752912
1	3	0.19	100	4.5962	6.0503				2.41905	3.18437	0.759665
1	3	0.206	100	3.2254	7.0974				1.56573	3.44534	0.454448
2	3	0.196	100	3.5669	5.731				1.81985	2.92398	0.622387
2	3	0.183	100	4.7671	5.0786				2.60497	2.77519	0.938664
2	3	0.194	100	4.0778	5.7324				2.10196	2.95485	0.71136
3	3	0.181	100	2.781	5.5476				1.53646	3.06497	0.501298
3	3	0.183	100	3.9071	5.993				2.13503	3.27486	0.651944
3	3	0.166	100	3.3938	6.4222				2.04446	3.8688	0.528448
1	3	0.2	100	3.5873	6.4171				1.79365	3.20855	0.559022
1	3	0.177	100	3.554	5.0442				2.00791	2.84983	0.704572
1	3	0.154	100	4.2913	5.1173				2.78656	3.32292	0.838587
4	3	0.117	100	3.1872	2.5139				2.7241	2.14863	1.26783
4	3	0.158	100	3.1935	4.1024				2.0212	2.59646	0.778447
4	3	0.127	100	3.1864	3.9995				2.50898	3.14921	0.7967
2	3	0.124	100	3.3591	3.4607				2.70895	2.79089	0.970642
2	3	0.126	100	2.8421	3.8614				2.25563	3.0646	0.736028
2	3	0.113	100	3.4103	3.3298				3.01796	2.94673	1.02418
5	3	0.144	100	2.1568	3.3446				1.49778	2.32264	0.64486
5	3	0.16	100	2.4225	3.4637				1.51406	2.16481	0.699397
5	3	0.11	100	1.5187	2.9877				1.38064	2.71609	0.508317
1	3	0.151	100	4.9373	3.912				3.26974	2.59073	1.26209
1	3	0.113	100	3.819	3.194				3.37965	2.82655	1.19568
1	3	0.175	100	4.0865	5.7201				2.33514	3.26863	0.714411
5	3	0.151	100	3.5899	3.8358				2.37742	2.54026	0.935893
5	3	0.145	100	3.027	4.117				2.08759	2.83931	0.735244
5	3	0.107	100	3.4857	2.4895				3.25766	2.32664	1.40016
4	3	0.164	100	3.3696	4.6236				2.05463	2.81927	0.728783
4	3	0.158	100	4.0959	3.4251				2.59234	2.16778	1.19585
4	3	0.141	100	4.5322	3.2832				3.21433	2.32851	1.38042
3	3	0.141	100	2.8336	4.6242				2.00965	3.27957	0.612776
3	3	0.106	100	2.6156	3.7198				2.46755	3.50925	0.703156
3	3	0.146	100	3.4873	4.0848				2.38856	2.79781	0.853726
2	3	0.128	100	3.2795	3.6391				2.56211	2.84305	0.901184
2	3	0.165	100	3.4256	4.0734				2.07612	2.46873	0.840968
2	3	0.166	100	3.5122	4.072				2.11578	2.45301	0.862525
5	4	0.296	100	0.709467	9.2313				0.239685	3.11868	0.0768545
5	4	0.301	100	0.465367	7.0319				0.154607	2.33618	0.0661794
5	4	0.317	100	1.26307	9.1278				0.398444	2.87943	0.138376
3	4	0.301	100	0.869867	8.6527				0.288992	2.87465	0.100531
3	4	0.332	100	0.837567	9.1877				0.252279	2.76738	0.0911618
3	4	0.335	100	0.734267	8.6044				0.219184	2.56848	0.0853362
4	4	0.303	100	0.780667	8.824				0.257646	2.91221	0.0884709
4	4	0.308	100	1.03147	9.0529				0.334892	2.93925	0.113938
4	4	0.319	100	0.961467	10.1274				0.3014	3.17473	0.0949372
1	4	0.311	100	2.90197	8.5799				0.933108	2.75881	0.338229
1	4	0.312	100	3.07587	9.1298				0.985855	2.92622	0.336904
1	4	0.295	100	2.53307	8.1251				0.858667	2.75427	0.311758
2	4	0.315	100	1.07117	8.9406				0.340053	2.83829	0.119809
2	4	0.288	100	1.04047	9.3569				0.361273	3.24892	0.111198
2	4	0.319	100	0.561767	7.3755				0.176103	2.31207	0.0761666
3	4	0.335	100	1.10777	9.4499				0.330677	2.82087	0.117225
3	4	0.333	100	0.944367	9.7634				0.283594	2.93195	0.0967252
3	4	0.328	100	0.959767	8.6872				0.292612	2.64854	0.110481
1	4	0.325	100	1.25687	8.03				0.386728	2.47077	0.156521
1	4	0.344	100	1.13907	10.2801				0.331124	2.9884	0.110803
1	4	0.3	100	1.05847	7.7416				0.352822	2.58053	0.136725
4	4	0.31	100	0.872067	10.0542				0.281312	3.24329	0.0867366
4	4	0.309	100	0.842667	7.5171				0.272708	2.43272	0.1121
4	4	0.34	100	0.911467	7.2572				0.268079	2.13447	0.125595
2	4	0.324	100	0.726367	8.6758				0.224187	2.67772	0.0837233
2	4	0.326	100	0.518667	8.0623				0.1591	2.4731	0.0643324
2	4	0.38	100	0.498467	9.9204				0.131176	2.61063	0.0502467
5	4	0.33	100	0.423867	8.665				0.128445	2.62576	0.0489171
5	4	0.301	100	0.498867	7.5542				0.165737	2.5097	0.0660384
5	4	0.324	100	0.529467	7.5585				0.163416	2.33287	0.0700492
1	4	0.266	100	0.522767	9.3036				0.196529	3.49759	0.0561898
1	4	0.295	100	1.01637	7.3558				0.344531	2.49349	0.138172
1	4	0.314	100	1.06707	7.1931				0.33983	2.2908	0.148346
5	4	0.298	100	0.507067	6.9935				0.170157	2.34681	0.0725055
5	4	0.32	100	0.490967	8.1709				0.153427	2.55341	0.0600873
5	4	0.342	100	0.449667	9.2936				0.131482	2.71743	0.0483846
4	4	0.333	100	0.783567	8.5491				0.235305	2.5673	0.0916549
4	4	0.337	100	1.12347	8.186				0.333373	2.42908	0.137242
4	4	0.351	100	0.597167	8.1966				0.170133	2.33521	0.0728555
3	4	0.311	100	0.686567	7.4173				0.220761	2.38498	0.0925629
3	4	0.351	100	0.629667	7.9736				0.179392	2.27168	0.078969
3	4	0.334	100	0.665267	7.6232				0.199182	2.2824	0.0872687
2	4	0.298	100	0.487167	7.4399				0.163479	2.49661	0.0654803
2	4	0.338	100	0.570567	7.9736				0.168807	2.35905	0.071557
2	4	0.375	100	1.52907	9.4257				0.407751	2.51352	0.162223
