# Supplementary material for: Amendments to saline-sodic soils showed long-term effects on improving growth and yield of rice (Oryza sativa L.)
Source: PeerJ. 2020 Mar 10;8:e8726. doi: 10.7717/peerj.8726 (PMC7069413; doi:10.7717/peerj.8726)
Supplement: Supplemental Information 2 [file peerj-08-8726-s002.xlsx]

## Sheet: Sheet1
Soil properties in 2017
Treatment	Depth（cm）	EC(dS/m)	Ca(mmolc/L)	K(mmolc/L)	Na(mmolc/L)	OPss(bars)
manure	0-10	0.701	1.2	0.0923077	7.5087	-2.5236
	10-20	0.874	0.2	0.0871795	9.07391	-3.1464
	20-40	0.986	0.6	0.0512821	9.88261	-3.5496
	40-60	1.016	0.2	0.0282051	9.28261	-3.6576
	60-80	1.053	0.6	0.0871795	9.89565	-3.7908
	80-100	1.172	0.6	0.0666667	10.3391	-4.2192
gypsum	0-10	0.463	0.6	0.0717949	4.48696	-1.6668
	10-20	0.364	0.4	0.0564103	3.97391	-1.3104
	20-40	0.523	0.4	0.0358974	5.62609	-1.8828
	40-60	0.555	0.2	0.0358974	5.19565	-1.998
	60-80	0.602	0.4	0.0358974	6.5087	-2.1672
	80-100	0.673	0.2	0.0282051	7.08261	-2.4228
mixture	0-10	0.551	1.2	0.0974359	4.61739	-1.9836
	10-20	0.374	0.2	0.0487179	4.03478	-1.3464
	20-40	0.46	0.4	0.0358974	5.09565	-1.656
	40-60	0.743	0.4	0.0769231	7.38696	-2.6748
	60-80	0.892	0.2	0.0333333	8.11739	-3.2112
	80-100	0.981	0.4	0.0769231	9.12174	-3.5316
sandy soil	0-10	0.376	1	0.0641026	3.35217	-1.3536
	10-20	0.336	0.6	0.0384615	4.02609	-1.2096
	20-40	0.579	0.2	0.0307692	6.15652	-2.0844
	40-60	0.719	0.4	0.0384615	7.16087	-2.5884
	60-80	0.86	0.6	0.0384615	8.02609	-3.096
	80-100	0.994	0.2	0.0282051	9.67391	-3.5784
CK	0-10	0.773	0.2	0.0512821	7.64348	-2.7828
	10-20	0.771	0.2	0.0564103	8.47826	-2.7756
	20-40	0.905	0.2	0.0564103	4.07391	-3.258
	40-60	1.118	0.2	0.0384615	10.8739	-4.0248
	60-80	1.276	0.2	0.0282051	11.887	-4.5936
	80-100	1.317	0.4	0.0307692	13.0174	-4.7412
mixture	0-10	0.316	0.9	0.0923077	2.55217	-1.1376
	10-20	0.218	0.4	0.0589744	2.37391	-0.7848
	20-40	0.256	0.2	0.0358974	2.84783	-0.9216
	40-60	0.45	0.1	0.0307692	4.61739	-1.62
	60-80	0.722	0.1	0.0461538	6.44783	-2.5992
	80-100	0.811	0.2	0.0333333	7.22609	-2.9196
gypsum	0-10	0.312	0.8	0.0512821	2.64348	-1.1232
	10-20	0.217	0.6	0.0307692	2.32609	-0.7812
	20-40	0.381	0.4	0.0307692	3.79565	-1.3716
	40-60	0.734	0.2	0.0307692	7.11304	-2.6424
	60-80	0.827	0.2	0.025641	7.28261	-2.9772
	80-100	0.892	0.2	0.0358974	8.1	-3.2112
CK	0-10	0.74	0.4	0.0538462	6.74348	-2.664
	10-20	0.673	0.2	0.0282051	6.85217	-2.4228
	20-40	0.9	0.2	0.0282051	8.43913	-3.24
	40-60	0.956	0.2	0.0282051	8.58696	-3.4416
	60-80	1.043	0.2	0.0487179	8.56957	-3.7548
	80-100	1.192	0.4	0.0384615	10.0261	-4.2912
sandy soil	0-10	0.471	0.4	0.105128	4.73478	-1.6956
	10-20	0.526	0.2	0.0692308	4.96957	-1.8936
	20-40	0.679	0.2	0.0948718	6.37391	-2.4444
	40-60	0.936	0.4	0.0666667	8.17826	-3.3696
	60-80	1.071	0.2	0.0769231	9.32609	-3.8556
	80-100	0.993	0.6	0.0666667	9.28696	-3.5748
manure	0-10	0.597	0.2	0.130769	5.76087	-2.1492
	10-20	0.397	0.6	0.0948718	5.71304	-1.4292
	20-40	0.649	0.2	0.0641026	7.36957	-2.3364
	40-60	0.778	0.1	0.0717949	8.27391	-2.8008
	60-80	0.813	0.1	0.0692308	8.04783	-2.9268
	80-100	0.857	0.6	0.0666667	9.06522	-3.0852
CK	0-10	0.434	0.2	0.0794872	5.06087	-1.5624
	10-20	0.64	0.2	0.0897436	5.44348	-2.304
	20-40	0.849	0.2	0.123077	7.34348	-3.0564
	40-60	0.961	0.2	0.0666667	8.39565	-3.4596
	60-80	1.058	0.2	0.0666667	10.1826	-3.8088
	80-100	1.155	0.2	0.074359	10.6217	-4.158
manure	0-10	0.412	0.4	0.112821	3.86957	-1.4832
	10-20	0.291	0.6	0.0974359	3.5	-1.0476
	20-40	0.679	0.2	0.0846154	6.74783	-2.4444
	40-60	0.837	0.4	0.0948718	8.32609	-3.0132
	60-80	0.928	0.1	0.0769231	8.61739	-3.3408
	80-100	0.869	0.3	0.0871795	9.03043	-3.1284
mixture	0-10	0.32	0.8	0.107692	3.6	-1.152
	10-20	0.527	0.4	0.102564	5.98261	-1.8972
	20-40	0.346	4.8	0.0923077	4.21304	-1.2456
	40-60	0.709	0.2	0.0769231	7.51304	-2.5524
	60-80	0.783	0.2	0.0820513	7.96087	-2.8188
	80-100	0.814	0.4	0.0820513	8.85217	-2.9304
sandy soil	0-10	0.534	1	0.138462	4.98696	-1.9224
	10-20	0.302	0.4	0.1	4.65652	-1.0872
	20-40	0.691	0.8	0.251282	6.74348	-2.4876
	40-60	0.918	0.2	0.0846154	8.31739	-3.3048
	60-80	0.926	0.1	0.074359	9.16087	-3.3336
	80-100	0.964	0.1	0.0794872	8.87391	-3.4704
gypsum	0-10	0.392	1.2	0.128205	5.01739	-1.4112
	10-20	0.42	0.4	0.105128	5.05652	-1.512
	20-40	0.664	0.4	0.164103	6.24348	-2.3904
	40-60	0.864	0.2	0.0897436	8.35652	-3.1104
	60-80	0.875	0.4	0.107692	7.98261	-3.15
	80-100	0.89	0.2	0.0384615	7.05652	-3.204
