# Supplementary material for: Amendments to saline-sodic soils showed long-term effects on improving growth and yield of rice (Oryza sativa L.)
Source: PeerJ. 2020 Mar 10;8:e8726. doi: 10.7717/peerj.8726 (PMC7069413; doi:10.7717/peerj.8726)
Supplement: Supplemental Information 3 [file peerj-08-8726-s003.xlsx]

## Sheet: Sheet1
Rice yield in 2017
Treatment	Height (cm)	Panicle length (cm)		number of Panicles	1000-grain weight (g)
manure	0.94	0.175	longest	9	21.8411
			middile	4
			shortest	4
manure	0.87	0.165	longest	5	23.2726
5			middile	5
5			shortest	4
gypsum	0.84	0.135	longest	6	21.677
3			middile	7
3			shortest	3
gypsum	0.95	0.14	longest	8	23.9311
3			middile	5
3			shortest	3
sandy soil	0.97	0.1675	longest	11	22.9482
4			middile	5
4			shortest	2
sandy soil	0.96	0.16	longest	7	23.2379
4			middile	7
4			shortest	4
CK	0.87	0.15	longest	7	18.4507
1			middile	4
1			shortest	3
CK	0.83	0.145	longest	5	20.371
1			middile	7
1			shortest	5
mixture	0.98	0.135	longest	10	25.0745
2			middile	5
2			shortest	5
mixture	0.92	0.15	longest	14	20.9345
2			middile	4
2			shortest	4
gypsum	1.03	0.14	longest	13	25.1063
3			middile	6
3			shortest	2
gypsum	0.93	0.15	longest	11	21.9892
3			middile	6
3			shortest	5
CK	0.88	0.13	longest	7	20.4797
1			middile	5
1			shortest	3
CK	0.98	0.145	longest	4	18.1373
1			middile	8
1			shortest	5
sandy soil	0.81	0.145	longest	8	19.5145
4			middile	4
4			shortest	5
sandy soil	0.76	0.15	longest	9	21.7205
4			middile	4
4			shortest	4
mixture	0.96	0.15	longest	11	23.9936
2			middile	4
2			shortest	5
mixture	0.94	0.135	longest	9	21.0108
2			middile	6
2			shortest	5
manure	0.89	0.14	longest	9	19.2212
			middile	6
			shortest	4
manure	0.82	0.145	longest	8	19.4825
5			middile	3
5			shortest	2
manure	0.96	0.155	longest	7	21.8924
			middile	5
			shortest	3
manure	0.91	0.14	longest	9	18.294
			middile	6
			shortest	6
sandy soil	0.87	0.155	longest	8	21.6175
4			middile	3
4			shortest	4
sandy soil	0.9	0.14	longest	7	20.9548
4			middile	5
4			shortest	4
gypsum	0.91	0.15	longest	11	18.3894
3			middile	3
3			shortest	7
gypsum	0.89	0.14	longest	10	20.4586
3			middile	4
3			shortest	3
mixture	0.94	0.1375	longest	16	22.3585
2			middile	12
2			shortest	4
mixture	0.91	0.15	longest	11	21.2744
2			middile	5
2			shortest	4
