# Supplementary material for: Amendments to saline-sodic soils showed long-term effects on improving growth and yield of rice (Oryza sativa L.)
Source: PeerJ. 2020 Mar 10;8:e8726. doi: 10.7717/peerj.8726 (PMC7069413; doi:10.7717/peerj.8726)
Supplement: Supplemental Information 4 [file peerj-08-8726-s004.xlsx]

## Sheet: Sheet1
Grain yield in 2010, 2012, 2015, 2017
Treatment	Grain yield (kg/ha)
	2010 year	2012 year	2015 year	2017 year
CK	0	0	4761.9	1428.57
CK	0	2571.43	4285.71	5476.19
CK	0	1619.05	5571.43	5476.19
mixture	7067.87	7238.1	7809.52	5952.38
mixture	8344.8	6857.14	6238.1	6428.57
mixture	7166.67	7047.62	6476.19	5714.29
sandy soil	5397.9	4666.67	5095.24	5476.19
sandy soil	1483.5	1333.33	5380.95	5714.29
sandy soil	3440.7	4000	5238.1	5476.19
gypsum	4682.87	4571.43	6523.81	5714.29
gypsum	8653.4	7142.86	5952.38	6428.57
gypsum	4876.03	5809.52	6523.81	5952.38
manure	93.6	4666.67	5571.43	6190.48
manure	2210	5904.76	5047.62	5714.29
manure	1599.8	4095.24	5309.52	5476.19
